# Supplementary material for: Geochemical signatures and nanomechanical properties of echinoid tests from nearshore habitats of Florida: environmental and physiological controls on echinoid biomineralization
Source: PeerJ. 2025 Jan 24;13:e18688. doi: 10.7717/peerj.18688 (PMC11771306; doi:10.7717/peerj.18688)
Supplement: Supplemental Information 5 [file peerj-13-18688-s005.xlsx]

## Sheet: Arkusz3
Supplemental data s5. Gorzelak et al. 2024. Geochemical signatures and nanomechanical properties of echinoid tests from nearshore habitats of Florida: Environmental and physiological controls on echinoid biomineralization. PeerJ. Last updated October 24, 2024.
Leodia sexiesperforata	sampled area (number of point indicated on photos)	fk-17.9	Mg/Ca	H	E
stereom type 1 (outer imperforate)	1	tubercle 1	0.224	4.53	84.62
stereom type 1 (outer imperforate)	2	tubercle 2	0.233	4.63	89.33
stereom type 1 (outer imperforate)	3	tubercle 3	0.192	4.49	84.15
stereom type 2 (inner thin galleried)	4	galleried 1	0.2	3.97	61.1
stereom type 2 (inner thin galleried)	5	galleried 2	0.203	4.22	66.2
stereom type 2 (inner thin galleried)	6	galleried 3	0.205	4.43	65.33
stereom type 3 (inner coarse labirynthic)	7	labirynthic 1	0.176	3.72	72.96
stereom type 3 (inner coarse labirynthic)	8	labirynthic 2	0.176	3.82	68.44
stereom type 3 (inner coarse labirynthic)	9	labirynthic 3	0.188	3.84	65.69
Leodia sexiesperforata		fk-3.1
stereom type 1 (outer imperforate)	10	tubercle 1	0.203	4.56	70.11
stereom type 1 (outer imperforate)	11	tubercle 2	0.193	4.28	75.08
stereom type 1 (outer imperforate)	12	tubercle 3	0.196	4.22	73.45
stereom type 2 (inner thin galleried)	13	galleried 1	0.175	3.84	74.59
stereom type 2 (inner thin galleried)	14	galleried 2	0.186	4.07	77.4
stereom type 2 (inner thin galleried)	15	galleried 3	0.19	4.32	81.21
stereom type 3 (inner coarse labirynthic)	16	labirynthic 1	0.19	3.93	79.68
stereom type 3 (inner coarse labirynthic)	17	labirynthic 2	0.191	4.3	83.56
stereom type 3 (inner coarse labirynthic)	18	labirynthic 3	0.191	4.3	80.81
Encope michelini		fk-9.1
stereom type 1 (outer imperforate)	19	tubercle 1	0.184	4.5	87.34
stereom type 1 (outer imperforate)	20	tubercle 2	0.17	4.24	84.8
stereom type 1 (outer imperforate)	21	tubercle 3	0.191	4.77	88.12
stereom type 2 (inner thin galleried)	22	galleried 1	0.153	3.92	69.38
stereom type 2 (inner thin galleried)	23	galleried 2	0.158	3.87	68.39
stereom type 2 (inner thin galleried)	24	galleried 3	0.161	3.99	55.97
stereom type 3 (inner coarse labirynthic)	25	labirynthic 1	0.157	4.05	72.86
stereom type 3 (inner coarse labirynthic)	26	labirynthic 2	0.158	3.92	70.81
stereom type 3 (inner coarse labirynthic)	27	labirynthic 3	0.151	3.52	72.74
Encope michelini		ap-8.7
stereom type 1 (outer imperforate)	28	tubercle 1	0.195	4.81	81.27
stereom type 1 (outer imperforate)	29	tubercle 2	0.185	4.6	82.73
stereom type 1 (outer imperforate)	30	tubercle 3	0.17	4.55	84.88
stereom type 2 (inner thin galleried)	31	galleried 1	0.14	3.7	49.69
stereom type 2 (inner thin galleried)	32	galleried 2	0.144	4.01	65.5
stereom type 2 (inner thin galleried)	33	galleried 3	0.152	4.08	71.1
stereom type 3 (inner coarse labirynthic)	34	labirynthic 1	0.145	4.37	63.28
stereom type 3 (inner coarse labirynthic)	35	labirynthic 2	0.135	3.61	58.6
stereom type 3 (inner coarse labirynthic)	36	labirynthic 3	0.136	4	66.52
